# Supplementary material for: Direct sample introduction GC-MS/MS for quantification of organic chemicals in mammalian tissues and blood extracted with polymers without clean-up
Source: PubMed Central journal article supplement (PMC7497510; doi:10.1007/s00216-020-02864-6), 2020-08-15
Supplement: 216_2020_2864_MOESM1_ESM.pdf [file 216_2020_2864_MOESM1_ESM.pdf]

## **Analytical and Bioanalytical Chemistry**

### **Electronic Supplementary Material**

#### **Direct sample introduction GC-MS/MS for quantification of organic chemicals in mammalian tissues and blood extracted with polymers without clean-up**

Andreas Baumer, Beate I. Escher, Julia Landmann, Nadin Ulrich

| <b>Section</b> | <b>Content</b>                                                                                                                                                   | <b>Page</b> |
|----------------|------------------------------------------------------------------------------------------------------------------------------------------------------------------|-------------|
| S1             | Additional information on the chemicals                                                                                                                          | S-3         |
| S2             | Determination of total lipid content                                                                                                                             | S-4         |
| S3             | Additional information on the DSI method                                                                                                                         | S-5         |
| S4             | Additional information on GC-MSD                                                                                                                                 | S-6         |
| S5             | Additional information on GC-MS/MS                                                                                                                               | S-8         |
| S6             | Partition coefficients                                                                                                                                           | S-13        |
| S7             | Comparison of tissue concentrations on a lipid weight basis ( $\text{ng g}_{\text{lw}}^{-1}$ ) calculated by predicted and experimentally partition coefficients | S-15        |
| S8             | Comparison of tissue concentrations obtained in this study and Chu et al. (2003)                                                                                 | S-16        |

## SECTION S1 Additional information on the chemicals

**Table S1** Analytes used in this study

| Analyte                                       | Abbreviation | CAS-Number  | Supplier                | Lot number | Purity [%]   |
|-----------------------------------------------|--------------|-------------|-------------------------|------------|--------------|
| Tributyl phosphate                            | TBP          | 126-73-8    | Alfa Aesar              | D1483A     | 98.0         |
| Atrazine                                      | ATZ          | 1912-24-9   | Cayman Chemical Company | 0464014-1  | Not reported |
| Tris(2-chloroethyl) phosphate                 | TCEP         | 115-96-8    | Sigma-Aldrich           | BCBS7575V  | 98.7         |
| Diazinon                                      | DAZ          | 333-41-5    | Sigma-Aldrich           | SZBC067XV  | 99.5         |
| 2,4,4'-Trichlorobiphenyl                      | PCB 28       | 7012-37-5   | Dr. Ehrenstorfer        | G151427    | 99.5         |
| Chlorpyrifos-methyl                           | CPM          | 5598-13-0   | Sigma-Aldrich           | BCBS0018   | 99.8         |
| 2,2',5,5'-Tetrachlorobiphenyl                 | PCB 52       | 35693-99-3  | Dr. Ehrenstorfer        | G130540    | 99.7         |
| Metolachlor                                   | MTC          | 51218-45-2  | Dr. Ehrenstorfer        | G167487    | 98.5         |
| Chlorpyrifos-ethyl                            | CPE          | 2921-88-2   | Sigma-Aldrich           | BCBS2937V  | 99.8         |
| Bromophos-methyl                              | BOM          | 2104-96-3   | Sigma-Aldrich           | SZBD333XV  | 99.5         |
| Irgarol                                       | IGL          | 28159-98-0  | Fluka                   | SZBB265XV  | 98.4         |
| Fipronil                                      | FPL          | 120068-37-3 | Fluka                   | SZBD198XV  | 98.6         |
| Bromophos-ethyl                               | BOE          | 4824-78-6   | Sigma-Aldrich           | SZBF177XV  | 97.6         |
| 2,2',4,5,5'-Pentachlorobiphenyl               | PCB 101      | 37680-73-2  | Dr. Ehrenstorfer        | G164246    | 98.5         |
| <i>p,p'</i> -Dichlorodiphenyldichloroethylene | DDE          | 72-55-9     | Sigma-Aldrich           | BCBS5816V  | 99.8         |
| Flamprop-methyl                               | FPM          | 52756-25-9  | Dr. Ehrenstorfer        | G159922    | 98.9         |
| Chlorfenapyr                                  | CFP          | 122453-73-0 | Sigma-Aldrich           | BCBT8625   | 99.2         |
| 2,3',4,4',5-Pentachlorobiphenyl               | PCB 118      | 31508-00-6  | Dr. Ehrenstorfer        | G151427    | 99.5         |
| <i>p,p'</i> -Dichlorodiphenyldichloroethane   | DDD          | 72-54-8     | Sigma-Aldrich           | BCBS3969V  | 99.9         |
| 2,2',4,4',5,5'-Hexachlorobiphenyl             | PCB 153      | 35065-27-1  | Dr. Ehrenstorfer        | G139987    | 98.8         |
| <i>p,p'</i> -Dichlorodiphenyltrichloroethane  | DDT          | 50-29-3     | Sigma-Aldrich           | BCBS5338V  | 98.0         |
| 2,2',3,4,4',5'-Hexachlorobiphenyl             | PCB 138      | 35065-28-2  | Dr. Ehrenstorfer        | G133150    | 99.4         |
| Triphenyl phosphate                           | TPP          | 115-86-6    | Supelco                 | MKBX5611V  | Not reported |
| <i>p,p'</i> -Dimethoxydiphenyltrichloroethane | MOC          | 72-43-5     | Dr. Ehrenstorfer        | 128313     | 99.0         |
| 2,2',3,4,4',5,5'-Heptachlorobiphenyl          | PCB 180      | 35065-29-3  | Dr. Ehrenstorfer        | G164639    | 97.09        |
| Tris(2-methylphenyl) phosphate                | TMPP         | 78-30-8     | Fluka                   | BCBP8611V  | 97.0         |
| 2,2',3,3',4,4',5,5'-Octachlorobiphenyl        | PCB 194      | 35694-08-7  | Dr. Ehrenstorfer        | G126420    | 99.6         |

**Table S2** Retention times ( $t_R$ ), MRM transitions of quantifier and qualifier ions, and their collision energies (CE) for each analyte

| Peak number | Analyte | Retention time $t_R$ [min] | Quantifier ion ( $m/z$ ) | CE (eV) | Qualifier ion ( $m/z$ ) | CE (eV) |
|-------------|---------|----------------------------|--------------------------|---------|-------------------------|---------|
| 1           | TBP     | 10.74                      | 155.1 → 99.0             | 10      | 211.1 → 99.0            | 10      |
| 2           | ATZ     | 12.45                      | 199.8 → 104.0            | 20      | 214.9 → 200.1           | 5       |
| 3           | TCEP    | 12.61                      | 248.9 → 125.0            | 10      | 248.9 → 62.9            | 20      |
| 4           | DAZ     | 13.33                      | 304.0 → 179.1            | 10      | 198.8 → 93.0            | 20      |
| 5           | PCB 28  | 14.57                      | 255.7 → 186.0            | 30      | 185.8 → 151.0           | 20      |
| 6           | CPM     | 14.87                      | 285.7 → 93.0             | 25      | 285.7 → 93.0            | 25      |
| 7           | PCB 52  | 15.76                      | 291.7 → 257.0            | 10      | 291.7 → 220.0           | 35      |
| 8           | MTC     | 16.39                      | 237.9 → 162.1            | 10      | 161.8 → 91.0            | 40      |
| 9           | CPE     | 16.53                      | 313.8 → 257.9            | 10      | 313.8 → 286.0           | 10      |
| 10          | BOM     | 16.92                      | 330.8 → 315.9            | 20      | 330.8 → 93.0            | 35      |
| 11          | IGL     | 17.40                      | 181.9 → 109.1            | 10      | 237.8 → 182.0           | 10      |
| 12          | FPL     | 17.44                      | 366.8 → 213.0            | 40      | 366.8 → 255.0           | 20      |
| 13          | BOE     | 17.71                      | 358.8 → 302.9            | 15      | 330.8 → 302.9           | 10      |
| 14          | PCB 101 | 17.76                      | 325.7 → 256.0            | 35      | 325.7 → 290.9           | 10      |
| 15          | DDE     | 18.19                      | 245.7 → 176.0            | 35      | 317.7 → 246.0           | 20      |
| 16          | FPM     | 18.31                      | 276.4 → 105.0            | 10      | 276.4 → 76.9            | 40      |
| 17          | CFP     | 18.57                      | 327.8 → 247.2            | 15      | 362.9 → 246.9           | 35      |
| 18          | PCB 118 | 18.67                      | 325.6 → 256.0            | 35      | 253.7 → 219.0           | 20      |
| 19          | DDD     | 18.79                      | 234.8 → 165.1            | 30      | 234.8 → 199.0           | 20      |
| 20          | PCB 153 | 19.00                      | 359.6 → 289.9            | 35      | 359.6 → 324.9           | 15      |
| 21          | DDT     | 19.35                      | 234.8 → 165.1            | 20      | 234.8 → 199.0           | 20      |
| 22          | PCB 138 | 19.42                      | 359.7 → 289.9            | 35      | 359.7 → 324.9           | 10      |
| 23          | TPP     | 19.60                      | 214.8 → 168.0            | 20      | 232.8 → 168.1           | 30      |
| 24          | MOC     | 20.26                      | 273.8 → 239.1            | 10      | 226.8 → 140.9           | 35      |
| 25          | PCB 180 | 20.50                      | 393.7 → 323.8            | 35      | 393.7 → 358.9           | 10      |
| 26          | TMPP    | 21.07                      | 368.1 → 181.1            | 10      | 276.8 → 179.0           | 10      |
| 27          | PCB 194 | 21.93                      | 429.7 → 359.9            | 40      | 429.7 → 394.9           | 15      |

## **SECTION S2     Determination of total lipid content**

Total lipid content was gravimetrically determined by employing a modified solvent extraction method after Smedes [1]. 50 to 500 mg of tissue were extracted in triplicates employing a mixture of water, CH and IPA (1.47 mL water, 1.3 mL of CH and 1 mL of IPA) in glass extraction vials and vortexed for 30 s. After centrifugation at 4000 rpm for 5 min, the upper CH phase was collected in a pre-weighted collection vial. Extraction was repeated three times by adding 1.13 mL of CH and 0.175 mL of IPA after each cycle. The combined solvent extracts were blown down under a gentle stream of nitrogen and further dried in a desiccator overnight and weighed in a microbalance (METTLER TOLEDO, Gießen, Germany). Total lipid content was determined gravimetrically and was corrected to negative and positive control, where bovine serum albumin (BSA) served as negative and triolein and POPC as positive controls, respectively. Additionally, a method blank containing water and extraction solvents without sample matrix was included in each batch of extraction and was treated as the samples and controls in order to exclude an extraction of any material from the used glassware and solvents caused by potential contamination.

## **SECTION S3    Additional information on the DSI method**

### **TDU maintenance**

Pre-conditioning of the empty thermal desorption liners with notch (for use with  $\mu$ -vials) was achieved following the vendors protocol by covering the liners with a solution of DCM : MeOH (1:1 V/V) for at least 2 h. The tubes were retrieved from the solvent mixture followed by a thermal bake-out at 280 °C overnight.  $\mu$ -vials, which were in direct contact with sample matrix, were cleaned by sonication with solvents of different polarities (MeOH, EA and CH) for 5 min before the pre-conditioning step described for thermal desorption liners above. Every septum, which is located inside the transport adapters, allowing liquid injection in thermal desorption tubes, was replaced at least every 40 injections.

### **DSI method development**

The DSI method was optimized in terms of different parameters: (1) TDU heating and hold time, (2) CIS cooling temperature and time, (3) CIS temperature hold time, (4) usage of different TDU tubes (tubes with notch together with a  $\mu$ -vial or tubes with frit and glass wool), (5) injection speed of solvent extracts and (6) vent flow inside the TDU. The resulted peak heights were compared and only one parameter was changed every run.

## SECTION S4 Additional information on GC-MSD

### Experimental method with GC-MSD

Preliminary experiments were carried out using a GC-MSD system. A GC 6890 (Agilent Technologies, USA) was coupled with a 5973 Single Quadrupole MS (Agilent Technologies, USA), which was operated in EI mode at 70 eV. Measurements were carried out using selected ion monitoring (SIM) with two ions for each compound as shown in Table S3. 1  $\mu$ L sample extract was injected in splitless mode into the SSL, which was kept at 250 °C. Chromatographic separation was performed on a DB 5-MS UI<sup>®</sup> capillary column (30 m length, 0.25  $\mu$ m i.d., 0.25  $\mu$ m film thickness, J&W Scientific, USA). The oven was programmed as follows: 60 °C (1 min) to 210 °C at 30 °C min<sup>-1</sup> (1 min), to 260 °C at 10 °C min<sup>-1</sup> (3 min) and finally to 300 °C at 40 °C min<sup>-1</sup> (3 min) which resulted in a total run time of 19 min. Helium (6.0 purity) was used as carrier gas in constant flow mode at 1.2 mL min<sup>-1</sup> and the solvent delay was set to 6.0 min. The MS transfer line was kept at 250 °C, the ion source at 230 °C and the quadrupole at 150 °C. MS ChemStation software (Agilent Technologies, USA) was used for instrument control and data acquisition.

**Table S3** Retention times ( $t_R$ ) and target ions for analysis with GC-MSD (SIM mode)

| Peak number | Analyte | $t_R$ [min] | Quantifier ( $m/z$ ) | Qualifier ( $m/z$ ) |
|-------------|---------|-------------|----------------------|---------------------|
| 1           | TBP     | 7.03        | 98.9                 | 155.0               |
| 2           | ATZ     | 7.74        | 200.0                | 215.0               |
| 3           | TCEP    | 7.77        | 248.9                | 63.0                |
| 4           | DAZ     | 7.95        | 179.1                | 137.0               |
| 5           | CPM     | 8.67        | 285.8                | 124.9               |
| 6           | PCB 28  | 8.73        | 255.9                | 186.0               |
| 7           | PCB 52  | 9.21        | 291.8                | 219.9               |
| 8           | MTC     | 9.33        | 162.1                | 238.0               |
| 9           | CPE     | 9.34        | 196.9                | 313.9               |
| 10          | BOM     | 9.71        | 330.8                | 124.9               |
| 11          | FPL     | 9.89        | 366.9                | 212.9               |
| 12          | BOE     | 10.37       | 358.8                | 302.8               |
| 13          | PCB 101 | 10.55       | 325.8                | 253.9               |
| 14          | DDE     | 11.01       | 245.9                | 317.9               |
| 15          | CFP     | 11.22       | 59.0                 | 246.9               |
| 16          | PCB 118 | 11.60       | 325.8                | 253.9               |
| 17          | DDD     | 11.73       | 234.9                | 165.0               |
| 18          | PCB 153 | 11.95       | 359.8                | 289.8               |
| 19          | PCB 138 | 12.44       | 359.8                | 289.8               |
| 20          | TPP     | 12.72       | 326.0                | 170.0               |
| 21          | PCB 180 | 13.87       | 393.7                | 323.8               |
| 22          | MOC     | 13.55       | 227.0                | -                   |
| 23          | PCB 194 | 16.01       | 429.7                | 357.8               |

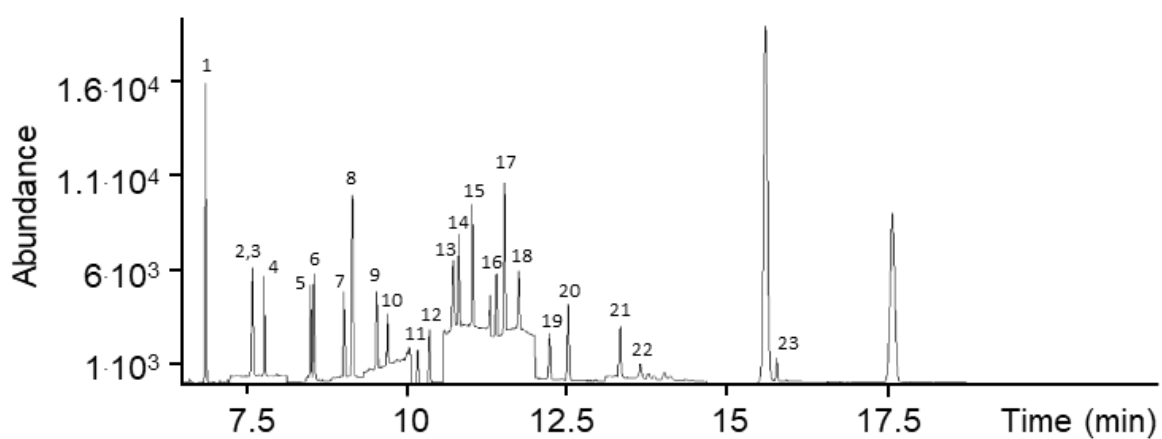

**Fig. S1** Liver matrix extract containing 50 pg  $\mu\text{L}^{-1}$  analyte solution in single ion monitoring (SIM) mode measured with GC-MSD. Peak numbers refer to elution order as shown in Table S3



SECTION S5 Additional information on GC-MS/MS

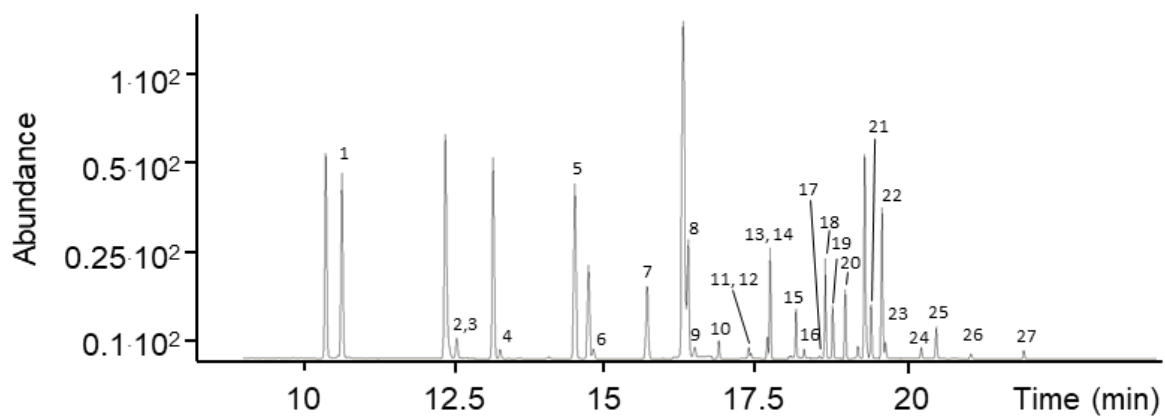

**Fig. S2** Liver matrix extract containing 20  $\mu\text{g } \mu\text{L}^{-1}$  analyte and internal standard solution in MRM mode measured with DSI GC-MS/MS. Peak numbers refer to elution order as shown in Table S2

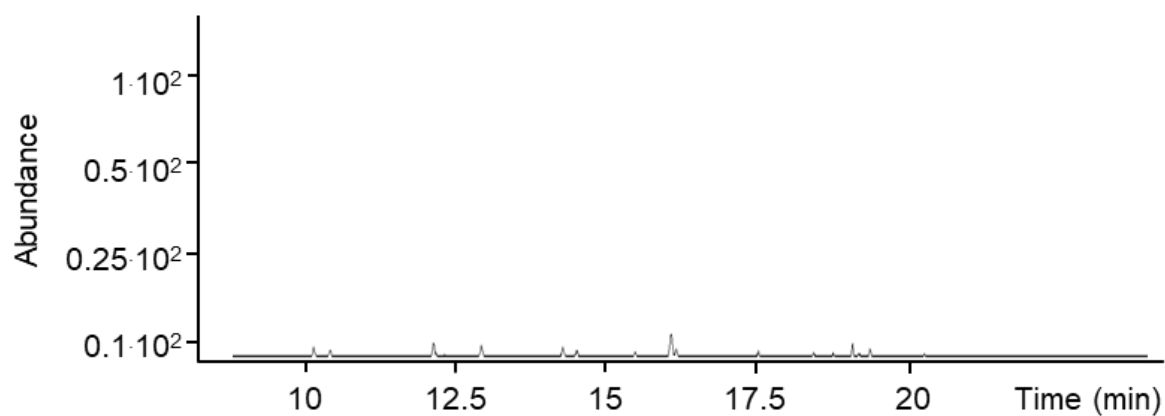

**Fig. S3** Liver blank matrix extract without internal standard solution in MRM mode measured with DSI GC-MS/MS

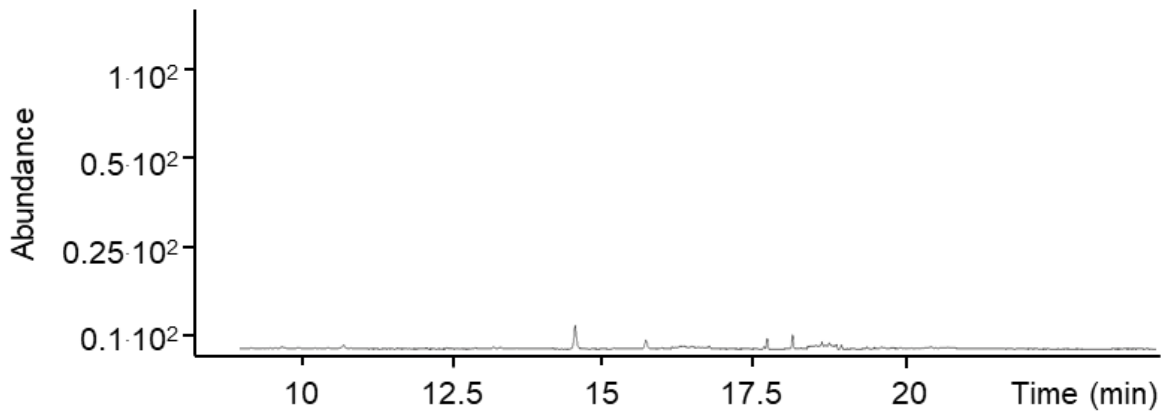

**Fig. S4** Solvent blank without internal standard solution in MRM mode measured with DSI GC-MS/MS

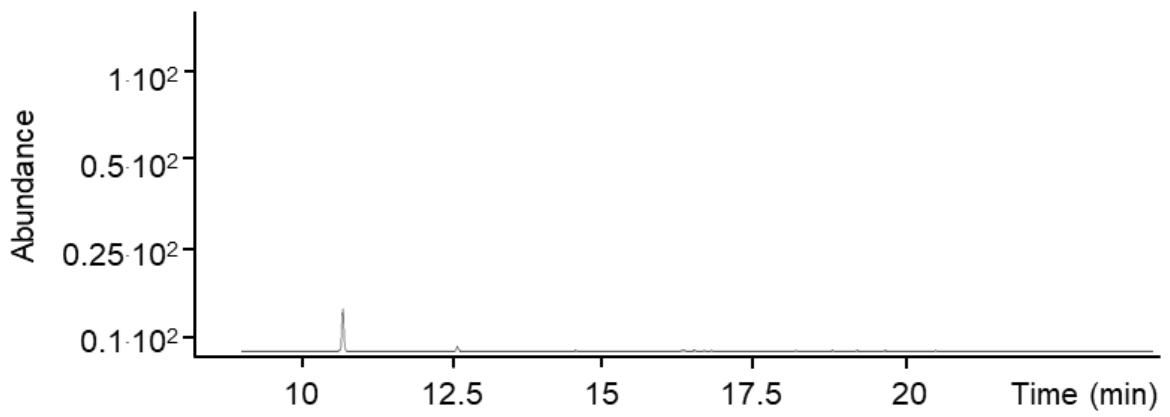

**Fig. S5** PDMS blank without internal standard solution in MRM mode measured with DSI GC-MS/MS

**Table S4** Comparison of slopes for calibration curves in ethylacetate and matrix-matched calibrations with consideration of errors on the slopes

| Analyte | Ethylacetate |          | Liver tissue |          | Brain tissue |          | Adipose tissue |          | Blood    |          |
|---------|--------------|----------|--------------|----------|--------------|----------|----------------|----------|----------|----------|
|         | Slope        | se slope | Slope        | se slope | Slope        | se slope | Slope          | se slope | Slope    | se slope |
| TBP     | 6.36E-03     | 9.80E-05 | 6.52E-03     | 2.32E-04 | 6.23E-03     | 2.20E-04 | 6.26E-03       | 2.84E-04 | 6.36E-03 | 9.66E-05 |
| ATZ     | 4.38E-03     | 9.15E-05 | 4.46E-03     | 6.39E-05 | 4.40E-03     | 8.01E-05 | 4.26E-03       | 8.45E-05 | 4.50E-03 | 9.10E-05 |
| TCEP    | 1.59E-03     | 1.85E-05 | 1.66E-03     | 1.20E-05 | 1.55E-03     | 2.52E-05 | 1.71E-03       | 2.73E-05 | 1.53E-03 | 6.25E-06 |
| DAZ     | 1.49E-03     | 7.91E-06 | 1.56E-03     | 2.03E-06 | 1.51E-03     | 8.94E-06 | 1.50E-03       | 6.13E-06 | 1.55E-03 | 8.09E-06 |
| PCB 28  | 2.01E-02     | 6.21E-05 | 2.01E-02     | 9.19E-05 | 1.99E-02     | 7.42E-05 | 2.00E-02       | 1.06E-04 | 2.00E-02 | 8.18E-05 |
| CPM     | 5.64E-03     | 2.20E-05 | 5.56E-03     | 1.05E-05 | 5.58E-03     | 2.13E-05 | 5.71E-03       | 2.34E-05 | 5.81E-03 | 1.06E-05 |
| PCB 52  | 1.17E-02     | 5.82E-05 | 1.17E-02     | 4.02E-05 | 1.18E-02     | 3.14E-05 | 1.16E-02       | 5.50E-05 | 1.18E-02 | 2.16E-05 |
| MTC     | 4.55E-03     | 1.31E-05 | 4.62E-03     | 1.27E-05 | 4.51E-03     | 3.35E-05 | 4.55E-03       | 2.38E-05 | 4.68E-03 | 1.55E-05 |
| CPE     | 4.00E-03     | 1.24E-05 | 4.00E-03     | 4.08E-05 | 4.09E-03     | 4.43E-05 | 4.00E-03       | 5.10E-06 | 4.21E-03 | 1.39E-05 |
| BOM     | 5.09E-03     | 3.93E-05 | 5.71E-03     | 8.74E-05 | 5.62E-03     | 3.14E-05 | 5.03E-03       | 7.02E-06 | 5.59E-03 | 3.65E-05 |
| IGL     | 1.14E-02     | 3.41E-05 | 1.14E-02     | 4.52E-04 | 1.13E-02     | 2.96E-04 | 1.16E-02       | 1.86E-04 | 1.42E-02 | 2.81E-04 |
| FPL     | 2.13E-04     | 7.31E-06 | 3.50E-04     | 2.25E-06 | 2.69E-04     | 9.44E-07 | 3.24E-04       | 5.00E-06 | 2.81E-04 | 1.91E-06 |
| BOE     | 6.42E-03     | 3.32E-05 | 7.61E-03     | 3.66E-05 | 6.44E-03     | 9.93E-05 | 6.00E-03       | 7.07E-06 | 7.47E-03 | 2.62E-05 |
| PCB 101 | 2.13E-02     | 7.96E-05 | 2.12E-02     | 1.46E-04 | 2.17E-02     | 1.52E-04 | 2.11E-02       | 9.35E-05 | 2.18E-02 | 2.68E-05 |
| DDE     | 9.73E-03     | 2.93E-04 | 7.22E-03     | 7.10E-05 | 7.53E-03     | 3.35E-05 | 8.74E-03       | 5.45E-05 | 8.89E-03 | 3.98E-05 |
| FPM     | 3.97E-04     | 7.62E-06 | 5.78E-04     | 5.08E-06 | 4.97E-04     | 3.35E-06 | 4.51E-04       | 2.66E-06 | 6.26E-04 | 5.52E-06 |
| CFP     | 4.80E-05     | 8.50E-07 | 6.36E-05     | 1.15E-06 | 5.56E-05     | 5.92E-07 | 4.89E-05       | 5.15E-07 | 7.58E-05 | 9.57E-07 |
| PCB 118 | 2.43E-02     | 1.14E-04 | 2.43E-02     | 1.29E-04 | 2.40E-02     | 8.97E-05 | 2.43E-02       | 9.46E-05 | 2.44E-02 | 1.76E-04 |
| DDD     | 9.68E-03     | 7.53E-05 | 9.93E-03     | 6.99E-05 | 9.91E-03     | 1.31E-04 | 1.14E-02       | 6.32E-05 | 1.18E-02 | 1.60E-04 |
| PCB 153 | 2.11E-02     | 7.05E-05 | 2.10E-02     | 9.50E-05 | 2.09E-02     | 4.70E-05 | 2.08E-02       | 9.37E-05 | 2.08E-02 | 1.98E-04 |
| DDT     | 2.65E-03     | 2.13E-05 | 2.58E-03     | 1.50E-05 | 2.64E-03     | 1.21E-05 | 2.60E-03       | 1.22E-05 | 2.78E-03 | 3.25E-05 |
| PCB 138 | 2.16E-02     | 1.41E-04 | 2.20E-02     | 7.27E-05 | 2.20E-02     | 7.14E-05 | 2.17E-02       | 1.50E-04 | 2.24E-02 | 2.74E-04 |
| TPP     | 2.93E-03     | 8.77E-05 | 2.70E-03     | 7.21E-05 | 2.97E-03     | 2.81E-04 | 3.37E-03       | 1.50E-04 | 3.20E-03 | 4.91E-05 |
| MOC     | 8.94E-05     | 1.40E-06 | 8.94E-05     | 2.16E-06 | 8.21E-05     | 6.56E-07 | 1.33E-04       | 1.44E-06 | 7.36E-05 | 1.01E-06 |
| PCB 180 | 1.98E-02     | 5.32E-05 | 1.92E-02     | 1.11E-04 | 1.94E-02     | 9.90E-05 | 1.92E-02       | 1.09E-04 | 2.13E-02 | 1.29E-04 |
| TMPP    | 4.60E-03     | 8.55E-05 | 1.76E-03     | 5.33E-06 | 1.82E-03     | 2.57E-05 | 2.34E-03       | 2.14E-05 | 3.08E-03 | 5.73E-05 |
| PCB 194 | 9.51E-03     | 2.44E-05 | 8.34E-03     | 6.41E-05 | 8.52E-03     | 1.75E-04 | 1.07E-02       | 5.59E-05 | 8.40E-03 | 2.52E-05 |

**Table S5** Comparison of matrix effects (ME) with consideration of errors on the calculated ME

| Analyte | Liver tissue |           | Brain tissue |           | Adipose tissue |           | Blood  |           |
|---------|--------------|-----------|--------------|-----------|----------------|-----------|--------|-----------|
|         | ME (%)       | se ME (%) | ME (%)       | se ME (%) | ME (%)         | se ME (%) | ME (%) | se ME (%) |
| TBP     | 103%         | 5.2%      | 98%          | 5.0%      | 98%            | 6.0%      | 100%   | 3.1%      |
| ATZ     | 102%         | 3.6%      | 100%         | 3.9%      | 97%            | 4.0%      | 103%   | 4.2%      |
| TCEP    | 105%         | 2.0%      | 98%          | 2.7%      | 108%           | 3.0%      | 96%    | 1.5%      |
| DAZ     | 105%         | 0.7%      | 101%         | 1.1%      | 100%           | 0.9%      | 104%   | 1.1%      |
| PCB 28  | 100%         | 0.8%      | 99%          | 0.7%      | 99%            | 0.8%      | 99%    | 0.7%      |
| CPM     | 99%          | 0.6%      | 99%          | 0.8%      | 101%           | 0.8%      | 103%   | 0.6%      |
| PCB 52  | 100%         | 0.8%      | 101%         | 0.8%      | 99%            | 1.0%      | 101%   | 0.7%      |
| MTC     | 101%         | 0.6%      | 99%          | 1.0%      | 100%           | 0.8%      | 103%   | 0.6%      |
| CPE     | 100%         | 1.3%      | 102%         | 1.4%      | 100%           | 0.4%      | 105%   | 0.7%      |
| BOM     | 113%         | 2.6%      | 111%         | 1.5%      | 99%            | 0.9%      | 110%   | 1.6%      |
| IGL     | 100%         | 4.2%      | 99%          | 2.9%      | 101%           | 1.9%      | 125%   | 2.8%      |
| FPL     | 166%         | 6.7%      | 127%         | 4.8%      | 153%           | 7.6%      | 132%   | 5.4%      |
| BOE     | 119%         | 1.2%      | 101%         | 2.1%      | 94%            | 0.6%      | 116%   | 1.0%      |
| PCB 101 | 100%         | 1.1%      | 102%         | 1.1%      | 99%            | 0.8%      | 103%   | 0.5%      |
| DDE     | 74%          | 3.0%      | 77%          | 2.7%      | 90%            | 3.3%      | 91%    | 3.2%      |
| FPM     | 146%         | 4.1%      | 126%         | 3.3%      | 114%           | 2.9%      | 158%   | 4.4%      |
| CFP     | 135%         | 4.7%      | 116%         | 3.3%      | 104%           | 2.9%      | 159%   | 4.8%      |
| PCB 118 | 100%         | 1.0%      | 99%          | 0.8%      | 100%           | 0.9%      | 100%   | 1.2%      |
| DDD     | 103%         | 1.5%      | 102%         | 2.1%      | 118%           | 1.6%      | 122%   | 2.6%      |
| PCB 153 | 100%         | 0.8%      | 99%          | 0.6%      | 99%            | 0.8%      | 99%    | 1.3%      |
| DDT     | 97%          | 1.3%      | 99%          | 1.3%      | 98%            | 1.2%      | 105%   | 2.1%      |
| PCB 138 | 102%         | 1.0%      | 102%         | 1.0%      | 100%           | 1.3%      | 104%   | 1.9%      |
| TPP     | 101%         | 5.2%      | 109%         | 12.6%     | 120%           | 8.6%      | 119%   | 4.9%      |
| MOC     | 101%         | 4.0%      | 92%          | 2.2%      | 149%           | 3.9%      | 83%    | 2.4%      |
| PCB 180 | 97%          | 0.8%      | 98%          | 0.8%      | 97%            | 0.8%      | 108%   | 0.9%      |
| TMPP    | 38%          | 0.8%      | 39%          | 1.3%      | 51%            | 1.4%      | 67%    | 2.5%      |
| PCB 194 | 88%          | 0.9%      | 90%          | 2.1%      | 112%           | 0.9%      | 88%    | 0.5%      |

**Table S6** Conversion of LOD and LOQ values obtained from liver extracts in  $\text{pg } \mu\text{L}^{-1}$  extract to  $\text{ng g}_{\text{lipid}}^{-1}$

| Analyte | Liver extract [ $\text{pg } \mu\text{L}^{-1}$ ] |       | Liver extract [ $\text{ng g}_{\text{lipid}}^{-1}$ ] |      |
|---------|-------------------------------------------------|-------|-----------------------------------------------------|------|
|         | LOD                                             | LOQ   | LOD                                                 | LOQ  |
| TBP     | 35.2                                            | 106.6 | 27.5                                                | 83.3 |
| ATZ     | 1.4                                             | 4.2   | 1.1                                                 | 3.3  |
| TCEP    | 7.2                                             | 21.8  | 5.6                                                 | 17.0 |
| DAZ     | 1.8                                             | 5.3   | 1.4                                                 | 4.1  |
| PCB 28  | 3.7                                             | 11.4  | 2.9                                                 | 8.9  |
| CPM     | 1.8                                             | 5.6   | 1.4                                                 | 4.4  |
| PCB 52  | 3.4                                             | 10.3  | 2.7                                                 | 8.0  |
| MTC     | 2.0                                             | 6.0   | 1.6                                                 | 4.7  |
| CPE     | 2.3                                             | 6.9   | 1.8                                                 | 5.4  |
| BOM     | 1.8                                             | 5.5   | 1.4                                                 | 4.3  |
| IGL     | 2.1                                             | 6.2   | 1.6                                                 | 4.8  |
| FPL     | 7.1                                             | 21.7  | 5.5                                                 | 17.0 |
| BOE     | 1.5                                             | 4.4   | 1.2                                                 | 3.4  |
| PCB 101 | 2.4                                             | 7.3   | 1.9                                                 | 5.7  |
| DDE     | 2.7                                             | 8.1   | 2.1                                                 | 6.3  |
| FPM     | 4.4                                             | 13.3  | 3.4                                                 | 10.4 |
| CFP     | 29.1                                            | 88.2  | 22.7                                                | 68.9 |
| PCB 118 | 3.1                                             | 9.4   | 2.4                                                 | 7.3  |
| DDD     | 2.5                                             | 7.7   | 2.0                                                 | 6.0  |
| PCB 153 | 1.8                                             | 5.3   | 1.4                                                 | 4.1  |
| DDT     | 1.0                                             | 3.0   | 0.8                                                 | 2.3  |
| PCB 138 | 3.3                                             | 10.1  | 2.6                                                 | 7.9  |
| TPP     | 26.5                                            | 80.4  | 20.7                                                | 62.8 |
| MOC     | 5.0                                             | 20.0  | 3.9                                                 | 15.6 |
| PCB 180 | 2.3                                             | 7.0   | 1.8                                                 | 5.5  |
| TMPP    | 3.0                                             | 9.1   | 2.3                                                 | 7.1  |
| PCB 194 | 2.5                                             | 7.6   | 2.0                                                 | 5.9  |

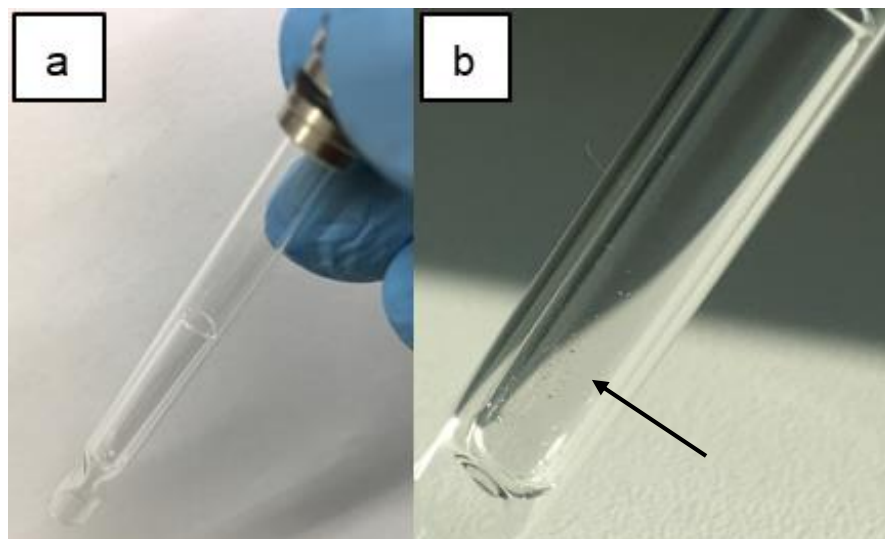

**Fig-S6** TDU-tube with notch and  $\mu$ -vial (a); Visible lipid droplets on the  $\mu$ -vial's glass surface after thermodesorption cycle of  $1 \mu\text{L}$  of liver sample extract injected in the tube (b)

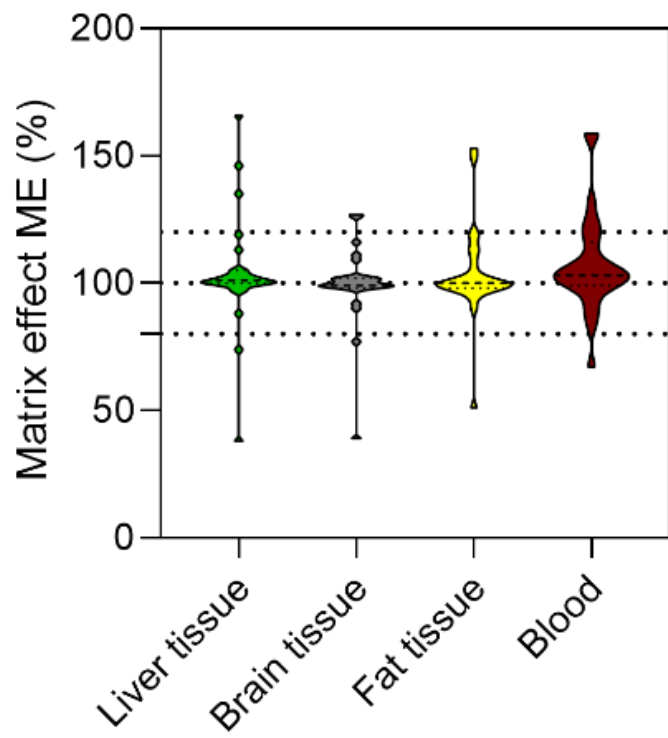

Fig. S7 Violin plot of matrix effects observed for liver, brain, fat and blood from pork

## SECTION S6 Partition coefficients

Concentrations in tissues  $C_{\text{tissue}}$  were calculated by multiplying measured concentrations in PDMS  $C_{\text{PDMS}}$  (Table 3) with the partition coefficient between the tissue and PDMS ( $K_{\text{tissue/PDMS}}$ ) according to Eq. (S1).

$$C_{\text{tissue}} = C_{\text{PDMS}} * K_{\text{tissue/PDMS}} \quad (\text{S1})$$

Since no experimentally determined partition coefficients were available for liver and brain tissue, we calculated  $K_{\text{tissue/PDMS}}$  for each tissue using the UFZ-LSER database [2].

The logarithmic PDMS-water partition coefficient ( $\log K_{\text{PDMS/water}}$ ) for each chemical detected was calculated using the equation of Stenzel et al. [3] according to Eq. (S2).

$$\log K_{\text{PDMS/water}} = 0.37 * L - 1.55 * S - 2.85 * A - 3.84 * B + 2.37 * V + 0.46 \quad (\text{S2})$$

The logarithmic tissue-water partition coefficient ( $\log K_{\text{tissue/water}}$ ) was obtained using the biopartitioning calculation tool embedded in the UFZ-LSER database [2]. As input parameter for the calculation of  $\log K_{\text{tissue/water}}$ , the lipid content of the individual human tissue (Table 1) was used. Since only the total lipid was determined, no differentiation between storage and membrane lipids could be made and all the lipids were assumed to be storage lipids. The total water content for each tissue was determined, but no value for total protein content was experimentally determined. As an assumption, the tissue composition was calculated by the sum of total water and lipid content with the assignment of the missing volume fraction as protein. The input parameters which were used for the calculation are shown in Table S7.  $K_{\text{tissue/PDMS}}$  can then be derived by Eq. (S3):

$$K_{\text{tissue/PDMS}} = \frac{K_{\text{tissue/water}}}{K_{\text{PDMS/water}}} \quad (\text{S3})$$

**Table S7** Input parameters for liver, brain and adipose tissue used in the biopartitioning calculation tool

| Tissue  | Volume fraction [%] |       |       |
|---------|---------------------|-------|-------|
|         | Protein             | Lipid | Water |
| Liver   | 26.4                | 3.6   | 70.0  |
| Brain   | 11.0                | 8.8   | 80.2  |
| Adipose | 1.5                 | 91.0  | 7.5   |

For the calculation of concentrations present in lipids ( $C_{\text{lipid}}$ ), the partition coefficient  $K_{\text{lipid/PDMS}}$  is needed. Experimental values are available for different oils and ranged from 13 to 55  $\text{g}_{\text{PDMS}} \text{g}_{\text{lipid}}^{-1}$  (not corrected for lipid uptake in the PDMS which occurs during sampling in biota tissues) [4]. But since there are no experimental values for the  $K_{\text{tissue/PDMS}}$ ,  $K_{\text{lipid/PDMS}}$  was also calculated using the UFZ database [2]. The  $C_{\text{lipid}}$  was calculated with Eq. (S4) by multiplying the measured concentration in PDMS with the partition coefficient  $K_{\text{lipid/water}}$ .

$$C_{\text{lipid}} = C_{\text{PDMS}} * K_{\text{lipid/PDMS}} \quad (\text{S4})$$

The logarithmic storage lipid-water partition coefficient ( $\log K_{\text{lipid/water}}$ ) for each chemical detected was calculated with Eq. (S5) according to Geisler et al. [5] from the UFZ-LSER database.

$$\log K_{\text{lipid/water}} = 0.58 * L - 1.62 * S - 1.93 * A - 4.15 * B + 1.99 * V + 0.55 \quad (\text{S5})$$

The partition coefficients used for calculation are summarized in Table S8.

**Table S8** Predicted partition constants between lipid and PDMS  $K_{\text{lipid/PDMS}} [g_{\text{PDMS}} g_{\text{lipid}}^{-1}]$  and between each tissue and PDMS  $K_{\text{tissue/PDMS}} [g_{\text{PDMS}} g_{\text{tissue}}^{-1}]$  from UFZ-LSER database and experimentally determined partition constants between lipid and PDMS  $K_{\text{lipid/PDMS}} [g_{\text{PDMS}} g_{\text{lipid}}^{-1}]$  from Jahnke et al (2008) [4]

| Compound | $K_{\text{lipid/PDMS}} [g_{\text{PDMS}} g_{\text{lipid}}^{-1}]$<br>(LSERD) | $K_{\text{liver/PDMS}} [g_{\text{PDMS}} g_{\text{liver}}^{-1}]$ | $K_{\text{brain/PDMS}} [g_{\text{PDMS}} g_{\text{brain}}^{-1}]$ | $K_{\text{adipose tissue/PDMS}} [g_{\text{PDMS}} g_{\text{adipose tissue}}^{-1}]$ | $K_{\text{lipid/PDMS}} [g_{\text{PDMS}} g_{\text{lipid}}^{-1}]$<br>(Jahnke et al.) |
|----------|----------------------------------------------------------------------------|-----------------------------------------------------------------|-----------------------------------------------------------------|-----------------------------------------------------------------------------------|------------------------------------------------------------------------------------|
| DDE      | 19.6                                                                       | 0.72                                                            | 1.63                                                            | 16.6                                                                              | 19.8                                                                               |
| DDD      | 17.0                                                                       | 0.67                                                            | 1.44                                                            | 14.4                                                                              | 51.1                                                                               |
| DDT      | 16.3                                                                       | 0.63                                                            | 1.37                                                            | 13.8                                                                              | 32.3                                                                               |
| PCB 138  | 17.0                                                                       | 0.65                                                            | 1.43                                                            | 14.4                                                                              | 25.5                                                                               |
| PCB 153  | 15.5                                                                       | 0.60                                                            | 1.31                                                            | 13.2                                                                              | 27.4                                                                               |
| PCB 180  | 21.0                                                                       | 0.79                                                            | 1.76                                                            | 17.7                                                                              | 32.2                                                                               |

**SECTION S7 Comparison of tissue concentrations on a lipid weight basis ( $\text{ng g}_{\text{lw}}^{-1}$ ) calculated by predicted and experimentally partition coefficients**

**Table S9** Comparison of concentrations (C) in each tissue reported in  $\text{ng g}_{\text{lw}}^{-1}$  (lw = lipid weight) derived from the calculation with  $K_{\text{lipid/PDMS}} [\text{g}_{\text{PDMS}} \text{g}_{\text{lipid}}^{-1}]$  predicted from UFZ LSER database and experimentally determined  $K_{\text{lipid/PDMS}} [\text{g}_{\text{PDMS}} \text{g}_{\text{lipid}}^{-1}]$  from Jahnke et al. and ratio R between concentration calculated with predicted  $K_{\text{lipid/PDMS}}$  and experimental  $K_{\text{lipid/PDMS}}$ .

| Compound | Liver tissue                                                  |                                                                | Brain tissue                                                  |                                                                | Adipose tissue                                                         |                                                                         | Ratio R |
|----------|---------------------------------------------------------------|----------------------------------------------------------------|---------------------------------------------------------------|----------------------------------------------------------------|------------------------------------------------------------------------|-------------------------------------------------------------------------|---------|
|          | $C_{\text{liver}}$ ( $\text{ng g}_{\text{lw}}^{-1}$ ) (LSERD) | $C_{\text{liver}}$ ( $\text{ng g}_{\text{lw}}^{-1}$ ) (Jahnke) | $C_{\text{brain}}$ ( $\text{ng g}_{\text{lw}}^{-1}$ ) (LSERD) | $C_{\text{brain}}$ ( $\text{ng g}_{\text{lw}}^{-1}$ ) (Jahnke) | $C_{\text{adipose tissue}}$ ( $\text{ng g}_{\text{lw}}^{-1}$ ) (LSERD) | $C_{\text{adipose tissue}}$ ( $\text{ng g}_{\text{lw}}^{-1}$ ) (Jahnke) |         |
| DDE      | 1761.0                                                        | 1782.0                                                         | 1134.9                                                        | 1148.4                                                         | 2267.8                                                                 | 2294.8                                                                  | 1.0     |
| DDD      | 40.9                                                          | 122.6                                                          | -                                                             | -                                                              | -                                                                      | -                                                                       | 3.0     |
| DDT      | 32.5                                                          | 64.6                                                           | 19.5                                                          | 38.8                                                           | 34.2                                                                   | 67.8                                                                    | 2.0     |
| PCB 138  | 25.6                                                          | 38.3                                                           | 25.6                                                          | 38.3                                                           | 88.6                                                                   | 132.6                                                                   | 1.5     |
| PCB 153  | 29.5                                                          | 52.1                                                           | 38.9                                                          | 68.5                                                           | 135.2                                                                  | 238.4                                                                   | 1.8     |
| PCB 180  | 25.2                                                          | 38.6                                                           | 16.8                                                          | 25.8                                                           | 121.6                                                                  | 186.8                                                                   | 1.5     |

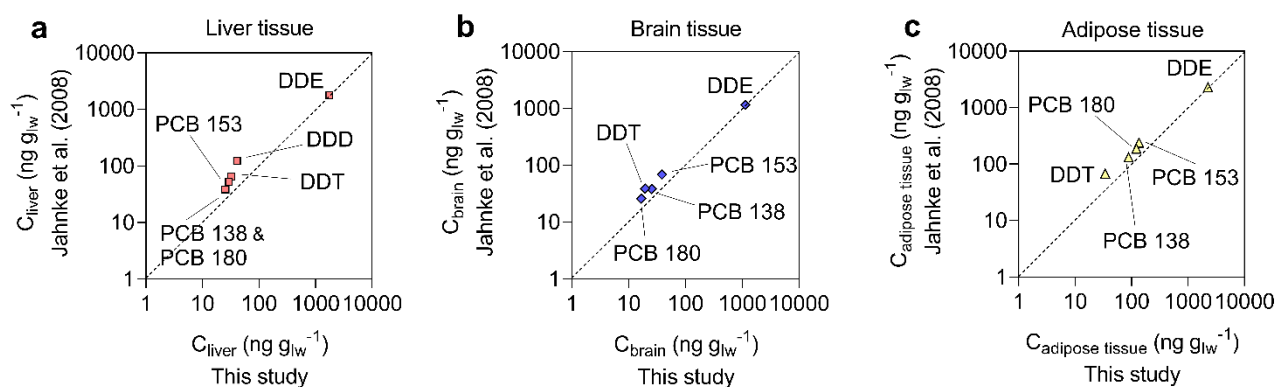

**Fig. S8** Visualisation of the data from Table S9. Comparison between tissue concentrations (in units of  $\text{ng g}_{\text{lw}}^{-1}$ , lw = lipid-normalized weight) calculated by the use of predicted  $K_{\text{lipid/PDMS}} [\text{g}_{\text{PDMS}} \text{g}_{\text{lipid}}^{-1}]$  from the UFZ-LSER database and experimental  $K_{\text{lipid/PDMS}} [\text{g}_{\text{PDMS}} \text{g}_{\text{lipid}}^{-1}]$  from Jahnke et al. [4]. Panel a shows liver, panel b brain and panel c adipose tissue. Dashed lines indicate 1:1 relationship



**SECTION S8 Comparison of tissue concentrations obtained in this study and Chu et al. (2003)**

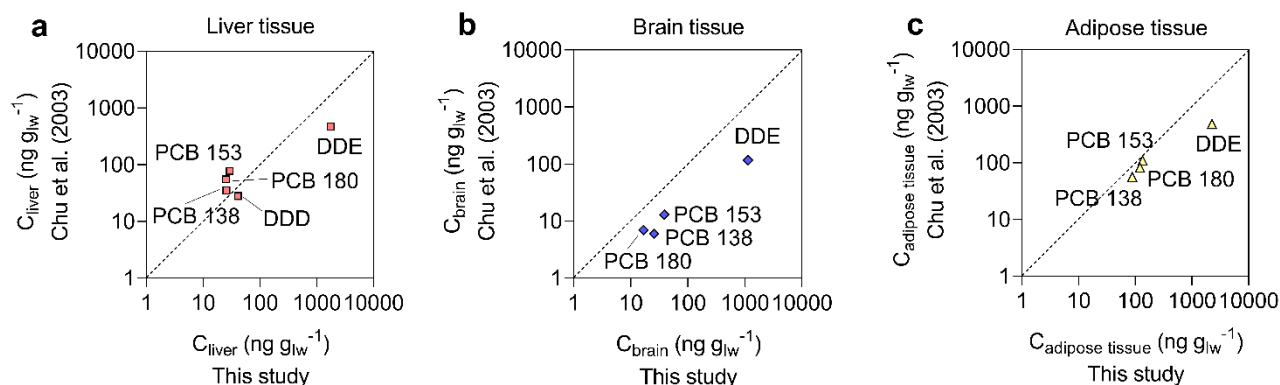

**Fig. S9** Comparison between tissue concentrations (in units of  $\text{ng g}_{\text{lw}}^{-1}$ , lw = lipid-normalized weight) measured by Chu et al. [6] using Soxhlet extraction followed by extract clean-up and concentrations obtained in this study. Panel a shows liver, panel b brain and panel c adipose tissue. Dashed lines indicate 1:1 relationship

**Table S10** Determination limits and mean tissue concentrations ( $\text{ng g}_{\text{lw}}^{-1}$ ) of Chu et al. [6] and LOQ observed in this study expressed as  $\text{ng g}_{\text{lw}}^{-1}$

| Analyte | Chu et al. (2003)                         |                                                                          |                                                                          |                                                                            | This study                                |
|---------|-------------------------------------------|--------------------------------------------------------------------------|--------------------------------------------------------------------------|----------------------------------------------------------------------------|-------------------------------------------|
|         | LOD [ $\text{ng g}_{\text{lipid}}^{-1}$ ] | Mean concentration in liver tissue [ $\text{ng g}_{\text{lipid}}^{-1}$ ] | Mean concentration in brain tissue [ $\text{ng g}_{\text{lipid}}^{-1}$ ] | Mean concentration in adipose tissue [ $\text{ng g}_{\text{lipid}}^{-1}$ ] | LOQ [ $\text{ng g}_{\text{lipid}}^{-1}$ ] |
| DDE     | 20                                        | 469                                                                      | 117                                                                      | 484                                                                        | 6                                         |
| DDD     | 20                                        | 28                                                                       | n.d.                                                                     | n.d.                                                                       | 6                                         |
| DDT     | 20                                        | n.d.                                                                     | n.d.                                                                     | n.d.                                                                       | 2                                         |
| PCB 52  | 3                                         | 5                                                                        | 3                                                                        | 3                                                                          | 8                                         |
| PCB 101 | 1                                         | 4                                                                        | 3                                                                        | 4                                                                          | 6                                         |
| PCB 118 | 3                                         | 17                                                                       | 4                                                                        | 20                                                                         | 8                                         |
| PCB 138 | 3                                         | 35                                                                       | 6                                                                        | 56                                                                         | 8                                         |
| PCB 153 | 3                                         | 78                                                                       | 13                                                                       | 109                                                                        | 4                                         |
| PCB 180 | 3                                         | 55                                                                       | 7                                                                        | 82                                                                         | 6                                         |

*n.d.* not detected

## References

1. Smedes F. Determination of total lipid using non-chlorinated solvents. *Analyst*. 1999;124(11):1711-8.
2. Ulrich N, Endo S, Brown TN, Watanabe N, Bronner G, Abraham MH, Goss KU. UFZ-LSER database v 3.2 [Internet], Leipzig, Germany, Helmholtz Centre for Environmental Research-UFZ. 2017 [accessed on 12.04.2020]. Available from <http://www.ufz.de/lserd>.
3. Stenzel A, Goss KU, Endo S. Determination of Polyparameter Linear Free Energy Relationship (pp-LFER) Substance Descriptors for Established and Alternative Flame Retardants. *Environ Sci Technol*. 2013;47(3):1399-406.
4. Jahnke A, McLachlan MS, Mayer P. Equilibrium sampling: Partitioning of organochlorine compounds from lipids into polydimethylsiloxane. *Chemosphere*. 2008;73(10):1575-81.
5. Geisler A, Endo S, Goss KU. Partitioning of Organic Chemicals to Storage Lipids: Elucidating the Dependence on Fatty Acid Composition and Temperature. *Environ Sci Technol*. 2012;46(17):9519-24.
6. Chu SG, Covaci A, Jacobs W, Haraguchi K, Schepens P. Distribution of methyl sulfone metabolites of polychlorinated biphenyls and p,p'-DDE in human tissues. *Environ Health Perspect*. 2003;111(9):1222-7.
